# Supplementary material
Source: Springer Nature journal article supplement (https://www.springermedizin.de/resource/supplementary/12874_2004_101_MOESM5_ESM.pdf/9433768)
Supplement: MOESM5 [file 9433768]

|                                                                                                                                                                                           |                                                                                                                                                                          | The Sample size ranges from 8 to 15.                                                                                                                                         | The Sample size ranges from 16 to 35.                                                                                                 | The Sample size ranges from 36 to 72.                                                                                            | The Sample size ranges from 73 to 120 and beyond.                             |
|-------------------------------------------------------------------------------------------------------------------------------------------------------------------------------------------|--------------------------------------------------------------------------------------------------------------------------------------------------------------------------|------------------------------------------------------------------------------------------------------------------------------------------------------------------------------|---------------------------------------------------------------------------------------------------------------------------------------|----------------------------------------------------------------------------------------------------------------------------------|-------------------------------------------------------------------------------|
| <b>Approximation of the mean.</b> Each number in this table represents the average relative error of estimating the sample mean in 200 samples from a Weibull distribution.               | <b>LEGEND:</b><br>The median approximation is represented by black crosses, Formula (4) is represented by blue boxes, and Formula (5) by red diamonds.                   |                                                                                                                                                                              |                                                                                                                                       |                                                                                                                                  |                                                                               |
|                                                                                                                                                                                           | <b>Median</b>                                                                                                                                                            | 9.59 %                                                                                                                                                                       | 7.85 %                                                                                                                                | 6.73 %                                                                                                                           | 6.24 %                                                                        |
|                                                                                                                                                                                           | <b>Formula (4)</b>                                                                                                                                                       | 6.11 %                                                                                                                                                                       | 8.17 %                                                                                                                                | 10.59 %                                                                                                                          | 13.37 %                                                                       |
|                                                                                                                                                                                           | <b>Formula (5)</b>                                                                                                                                                       | 5.57 %                                                                                                                                                                       | 7.73 %                                                                                                                                | 10.29 %                                                                                                                          | 13.17 %                                                                       |
|                                                                                                                                                                                           | <b>Conclusion</b>                                                                                                                                                        | Formula (5) is within 6% of the actual sample mean and is performing the best. Formula (4) is almost indistinguishable from Formula (5), and the median is very close behind | All three of these formulas are very close, but the median approximation starts being the best when the sample size reaches about 25. | The median continues to be the best estimator, separating itself from the other two formulas for the sample sizes in this range. | The averages stabilize and remain fairly steady as the sample size increases. |
| <b>Approximation of the standard deviation.</b> Each number in this table represents the average relative error of estimating the sample mean in 200 samples from a Weibull distribution. | <b>LEGEND:</b><br>The Formula (12) is shown using black crosses, Formula (16) is represented by blue boxes; Range/4 by the green circles, and Range/6 by brown diamonds. |                                                                                                                                                                              |                                                                                                                                       |                                                                                                                                  |                                                                               |
|                                                                                                                                                                                           | <b>Formula (12)</b>                                                                                                                                                      | 10.26 %                                                                                                                                                                      | 11.75 %                                                                                                                               | 15.92 %                                                                                                                          | 21.51 %                                                                       |
|                                                                                                                                                                                           | <b>Formula (16)</b>                                                                                                                                                      | 8.59 %                                                                                                                                                                       | 14.99 %                                                                                                                               | 27.22 %                                                                                                                          | 37.51 %                                                                       |
|                                                                                                                                                                                           | <b>Range/4</b>                                                                                                                                                           | 16.24 %                                                                                                                                                                      | 9.07 %                                                                                                                                | 11.14 %                                                                                                                          | 17.77 %                                                                       |
|                                                                                                                                                                                           | <b>Range/6</b>                                                                                                                                                           | 43.95 %                                                                                                                                                                      | 35.10 %                                                                                                                               | 27.42 %                                                                                                                          | 21.77 %                                                                       |
| <b>Conclusion</b>                                                                                                                                                                         | Formula (16) is the best estimator of the standard deviation in this range of sample sizes.                                                                              | The Range/4 formula takes over as the best estimate for the variance                                                                                                         | The Range/4 formula is slowly losing its advantage, and the Range/6 formula is closing in.                                            | The Range/6 takes over the lead in accuracy when the sample size reaches 114, and keeps it as the sample sizes increase.         |                                                                               |

TABLE 5: Weibull Distribution with parameters  $a = 2$  and  $b = 35$ .
